# Supplementary material for: KRE5 Suppression Induces Cell Wall Stress and Alternative ER Stress Response Required for Maintaining Cell Wall Integrity in Candida glabrata
Source: PLoS One. 2016 Aug 22;11(8):e0161371. doi: 10.1371/journal.pone.0161371 (PMC4993462; doi:10.1371/journal.pone.0161371)
Supplement: S1 Table — (XLSX) [file pone.0161371.s006.xlsx]

## Sheet: Sheet1
Strain	Parent	Genotype or description	Reference
CBS138	-	C. glabrata type strain, for genome project
ACG4	2001HT	his3 trp1 PScADH1-tetR-GAL4D::TRP1	[37]
HET80	ACG4	his3 trp1 PScADH1-tetR-GAL4D::TRP1 yku80 ILV2 (P182L)	[70]
HETS202	HET80	his3 trp1 PScADH1-tetR-GAL4D::TRP1 yku80::SAT1 flipper	[70]
tet-KRE5	HETS202	his3 trp1 PScADH1-tetR-GAL4D::TRP1 yku80::SAT1 flipper kre5::CgHIS3	This study
tet-KRE5DSLT2	tet-KRE5	his3 trp1 PScADH1-tetR-GAL4D::TRP1 yku80::SAT1 flipper kre5::CgHIS3 slt2::hphMX	This study
NAU3	CBS138	ura3	[74]
tet-KRE5DURA3	tet-KRE5	his3 trp1 ura3 PScADH1-tetR-GAL4D::TRP1 yku80::SAT1 flipper kre5::CgHIS3	This study
